# Supplementary material for: Heavy Metal Removal from Aqueous Solutions Using a Customized Bipolar Membrane Electrodialysis Process
Source: MDPI journal article supplement (doi:10.3390/molecules29081754), 2024-04-12

## Supplementary materials

Figure S1: SEM-EDX images of virgin and used membranes

Virgin anion exchange membrane (AEM)

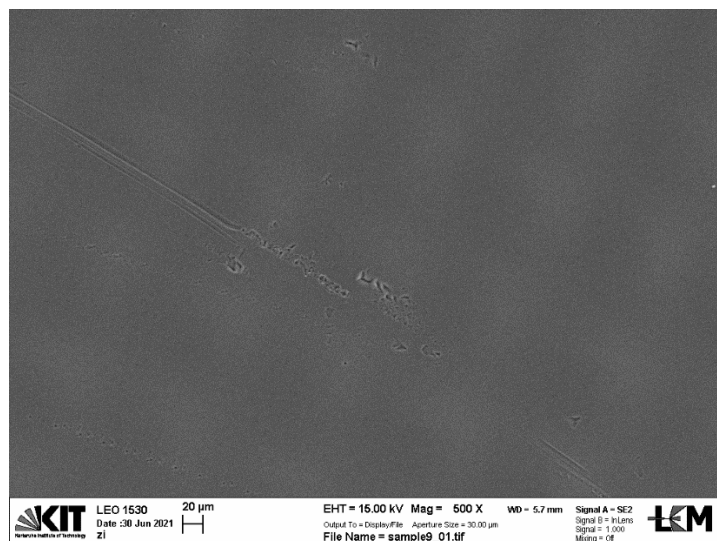

Full scale counts: 752

sample9\_01

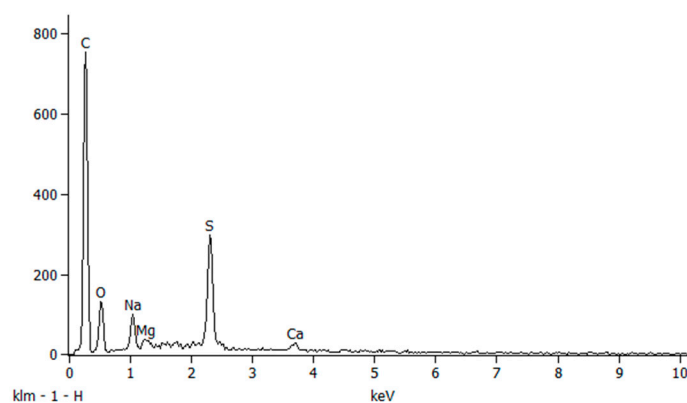

Full scale counts: 2342

sample9\_02

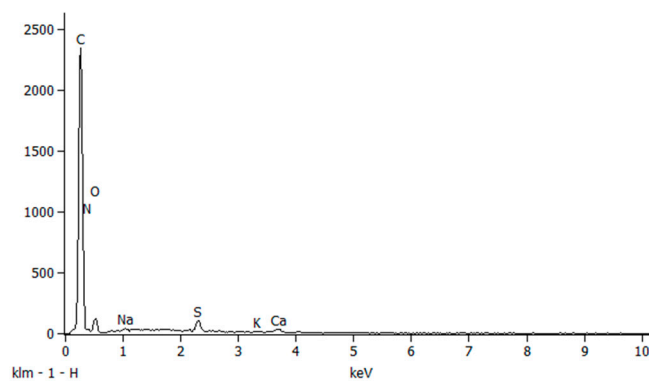

Virgin cation exchange membrane (CEM)

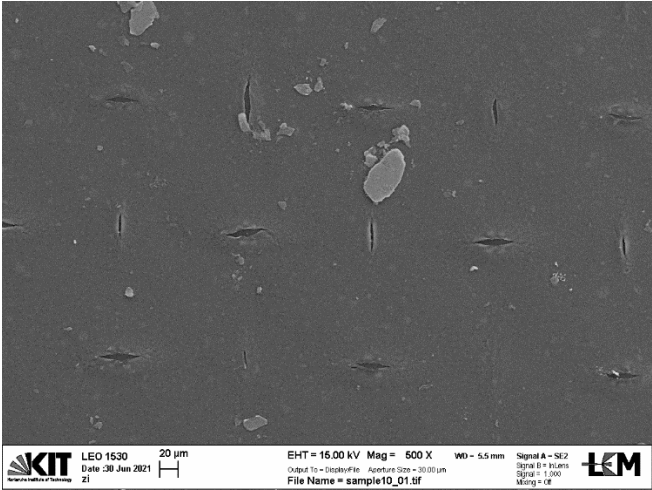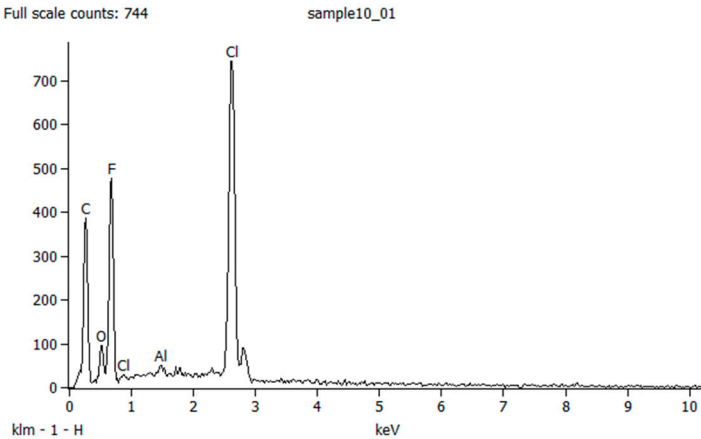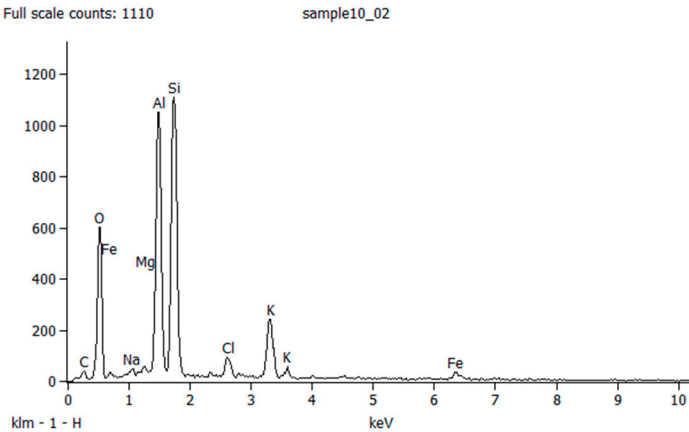

## Used Membranes

### 1. Used AEM+ heavy metal (HM)

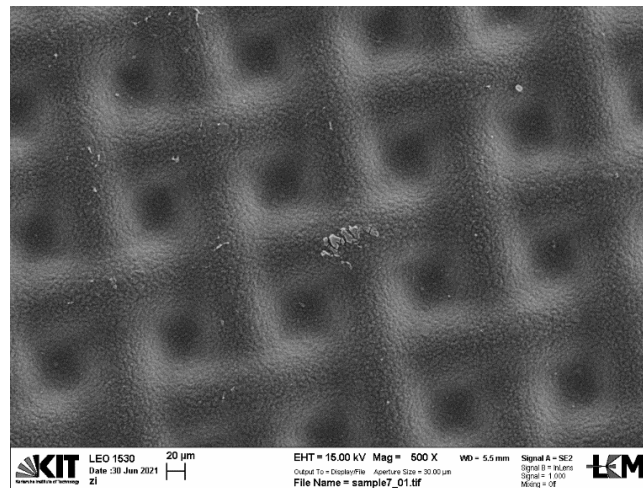

Full scale counts: 597

sample7\_01

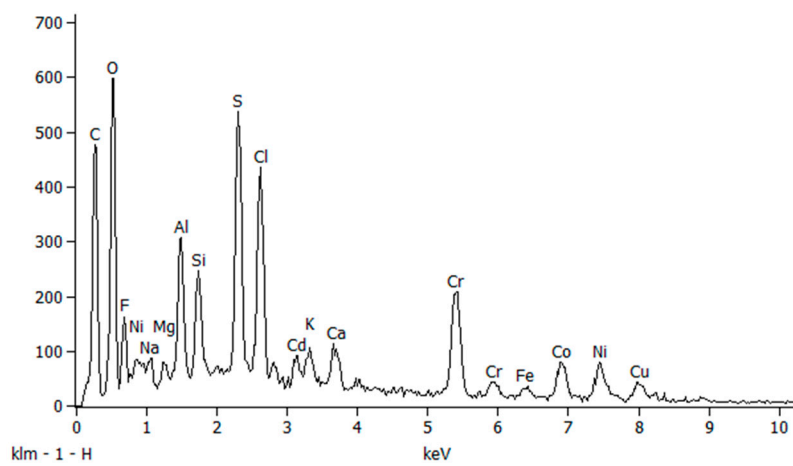

Full scale counts: 485

sample7\_02

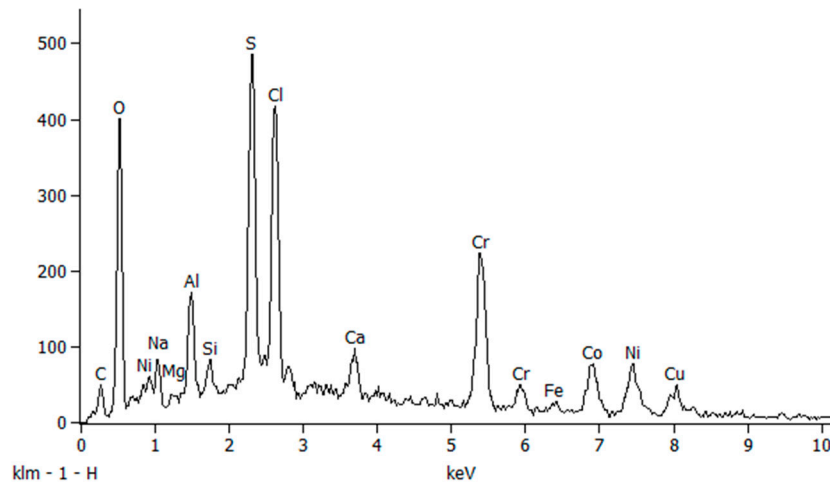

## 2. Used CEM + heavy metal (HM)

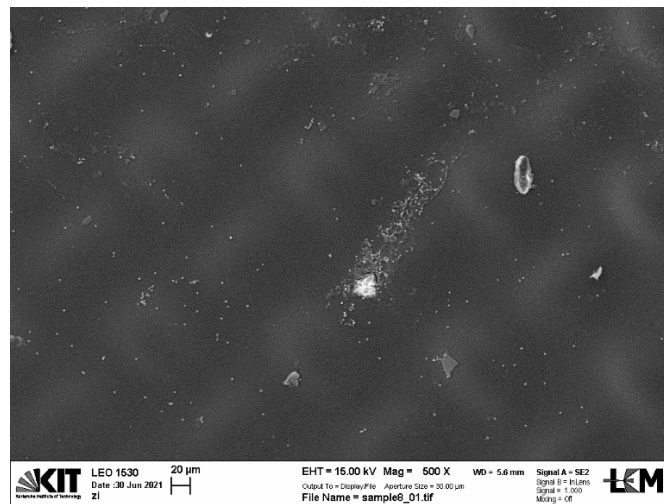

Full scale counts: 551

sample8\_01

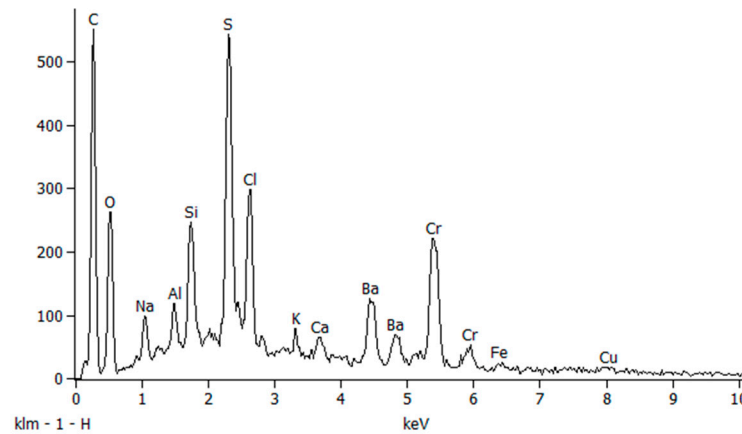

Full scale counts: 437

sample8\_03

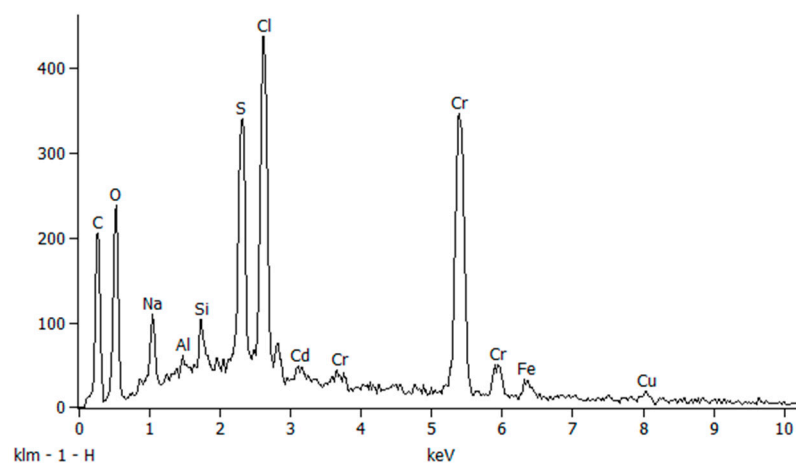

Supplement: s1 [file s1]
